# Supplementary material
Source: Springer Nature journal article supplement (https://www.springermedizin.de/resource/supplementary/13256_2013_2705_MOESM2_ESM.pdf/9651260)

**a**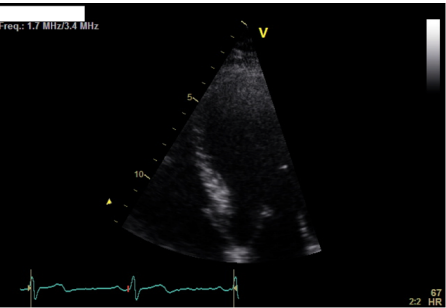**b**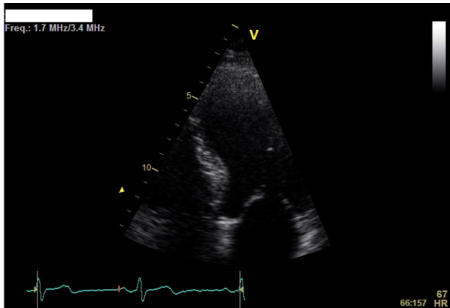

Supplement: MOESM2 [file 9651260]
